# Supplementary material for: Cyclometalated iridium complexes based on monodentate aminophosphanes
Source: Royal Society of Chemistry journal article supplement (doi:10.1039/d2dt02081e), 2022-01-01
Supplement: d2dt02081e2.pdf [file d2dt02081e2.pdf]

## Electronic Supporting Information

### Cyclometalated iridium complexes based on monodentate aminophosphanes

Marco Palmese, Jesús J. Pérez-Torrente, and Vincenzo Passarelli\*

Departamento de Química Inorgánica, Instituto de Síntesis Química y Catálisis Homogénea (ISQCH),  
Universidad de Zaragoza-CSIC, C/ Pedro Cerbuna 12, ES-50009 Zaragoza.

|                                                                                                                                                                                  |    |
|----------------------------------------------------------------------------------------------------------------------------------------------------------------------------------|----|
| 1. Crystal structure of $6PF_6$ and $12PF_6$ .....                                                                                                                               | 2  |
| 2. IR spectrum of $4[IrCl_2(CO)_2]$ in $CH_2Cl_2$ .....                                                                                                                          | 4  |
| 3. Polyhedral symbols for I, II, $5^+$ , $IV^+$ , $V^+$ , $12^+$ and $13^+$ .....                                                                                                | 5  |
| 4. Selected NMR data for 1, 2, $5^+$ , $6^+$ , $10^+$ , $12^+$ , and $13^+$ ,<br>with the proposed assignment.....                                                               | 6  |
| 5. $^1H$ , $^{31}P\{^1H\}$ and $^{13}C\{^1H\}$ -APT NMR spectra of $SiMe_3NP$ , 1-3, $4[IrCl_2(CO)_2]$ ,<br>$5PF_6$ , $6PF_6$ , $9^+$ , $11PF_6$ , $12PF_6$ , and $13PF_6$ ..... | 8  |
| 6. Monitoring of the reaction $12^+ \rightleftharpoons 13^+$ in $CH_2Cl_2$ .....                                                                                                 | 26 |
| 7. DFT data for the reaction $7^+ \rightleftharpoons 8^+$ .....                                                                                                                  | 27 |

## 1. Crystal structure of 6PF<sub>6</sub> and 12PF<sub>6</sub>

Figure SI1-top shows the asymmetric unit in the crystal structure of 6PF<sub>6</sub>. Two of the cations [IrH{κ<sup>2</sup>C,P-SiMe<sub>3</sub>N(4-C<sub>6</sub>H<sub>3</sub>CH<sub>3</sub>)PPh<sub>2</sub>}(cod)(CH<sub>3</sub>CN)]<sup>+</sup> exhibit A configuration (Figure SI1-bottom) of the metal centre (Ir1 and Ir3), whereas C configuration (Figure SI1-bottom) is observed for the remaining two cations (Ir2 and Ir4).

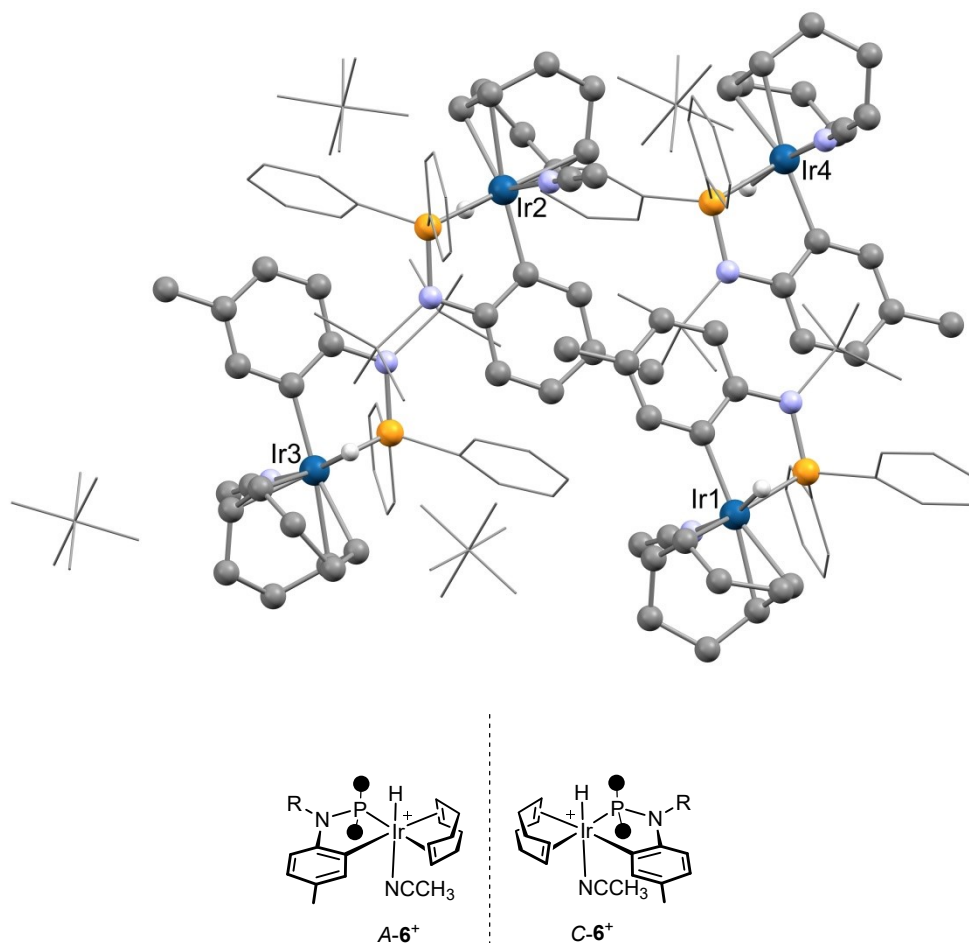

**Fig. SI1.** (top) View of the asymmetric unit in the crystal structure of 6PF<sub>6</sub>. For clarity, most hydrogen atoms are omitted and a wireframe style is adopted for the phenyl groups, the SiMe<sub>3</sub> moiety and the hexafluorophosphate anions; (bottom) View of the C and A enantiomers of 6<sup>+</sup>.

Figure S12 shows the asymmetric unit in the crystal structure of **12PF<sub>6</sub>**. One of the cations [IrH{κ<sup>2</sup>C,*P*-SiMe<sub>3</sub>N(4-C<sub>6</sub>H<sub>3</sub>CH<sub>3</sub>)PPh<sub>2</sub>}(HNP)<sub>2</sub>(CH<sub>3</sub>CN)}]<sup>+</sup> exhibits *C* configuration of the metal centre (Ir1), whereas *A* configuration is observed for the remaining cation (Ir2).

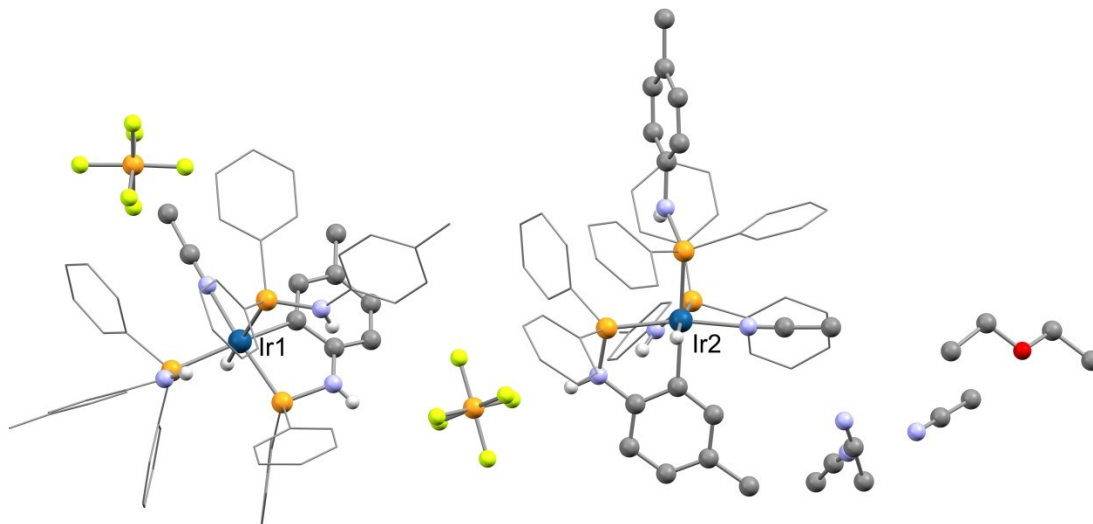

**Fig. S12.** View of the asymmetric unit in the crystal structure of **12PF<sub>6</sub>**. For clarity, most hydrogen atoms are omitted and a wireframe style is adopted for phenyl and selected tolyl groups.

## 2. IR spectrum of $4[\text{IrCl}_2(\text{CO})_2]$ in $\text{CH}_2\text{Cl}_2$

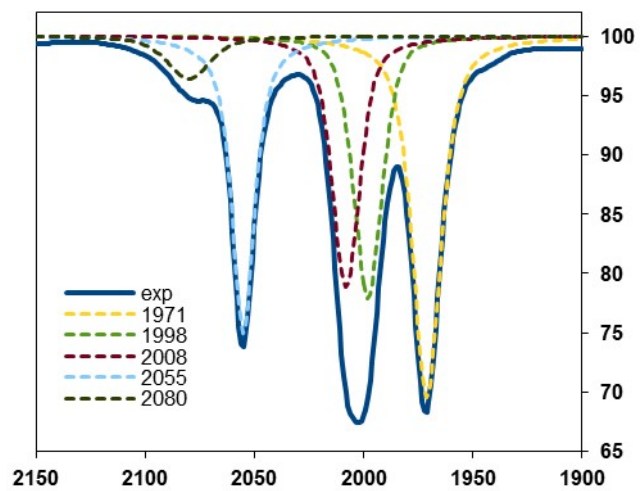

Fig. S13. IR spectrum of  $4[\text{IrCl}_2(\text{CO})_2]$  in  $\text{CH}_2\text{Cl}_2$  and its deconvolution.

### 3. Polyhedral symbols for I, II, 5<sup>+</sup>, IV<sup>+</sup>, V<sup>+</sup>, 12<sup>+</sup> and 13<sup>+</sup>.

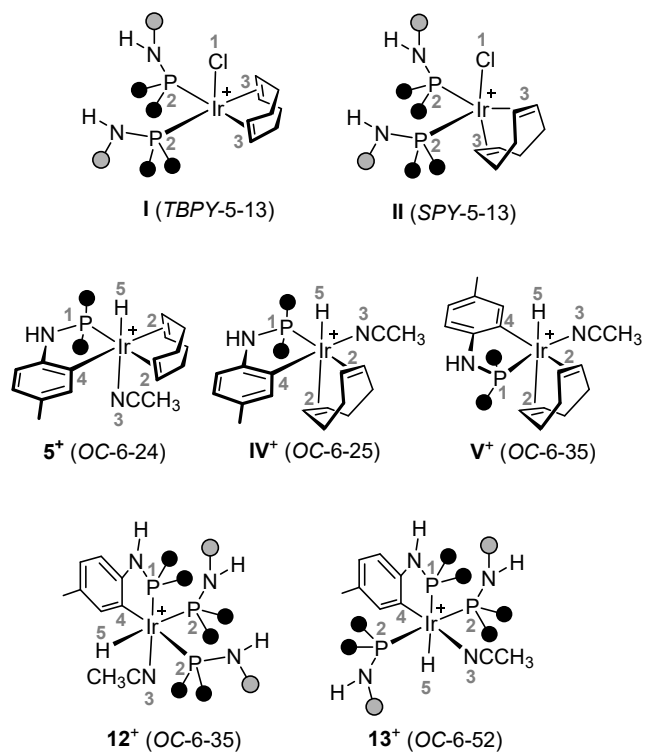

**Fig. S14.** Polyhedral symbols and ligand priority labelling scheme for I, II, 5<sup>+</sup>, IV<sup>+</sup>, V<sup>+</sup>, 12<sup>+</sup> and 13<sup>+</sup>.

#### 4. Selected NMR data for 1, 2, 5<sup>+</sup>, 6<sup>+</sup>, 10<sup>+</sup>, 12<sup>+</sup>, and 13<sup>+</sup>, with the proposed assignment

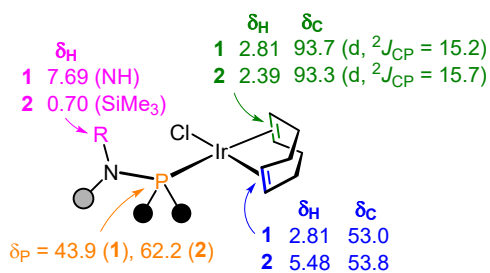

Fig. S15. Selected NMR data for 1 and 2 and the proposed assignment ( $\delta$  are given in ppm,  $J$  in Hz).

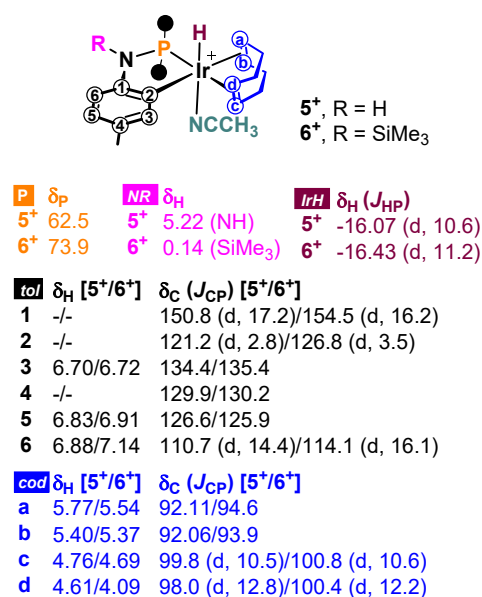

Fig. S16. Selected NMR data for 5<sup>+</sup> and 6<sup>+</sup> and the proposed assignment ( $\delta$  are given in ppm,  $J$  in Hz).

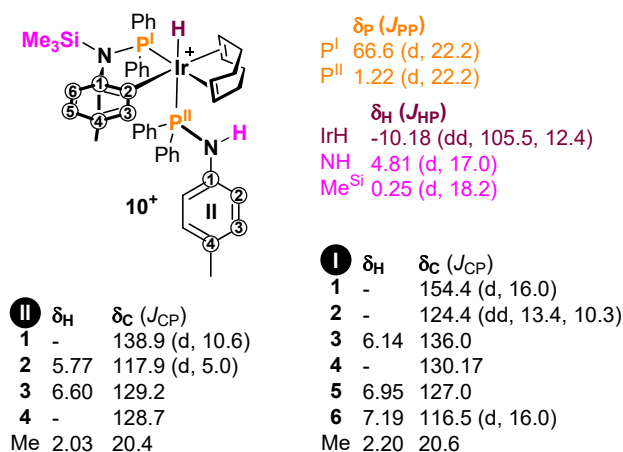

Fig. S17. Selected <sup>1</sup>H, <sup>13</sup>C and <sup>31</sup>P NMR data of 10<sup>+</sup> with the proposed assignment ( $\delta$  are given in ppm,  $J$  in Hz).

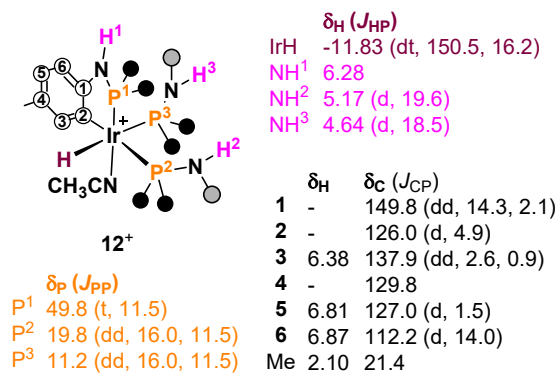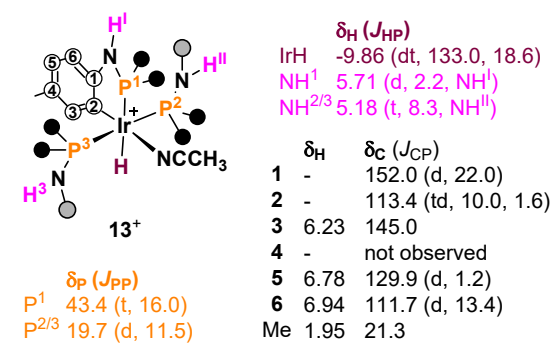

**Fig. S18.** Selected <sup>1</sup>H, <sup>13</sup>C and <sup>31</sup>P NMR data for **12<sup>+</sup>** and **13<sup>+</sup>** with the proposed assignment ( $\delta$  are given in ppm, *J* in Hz).

5.  $^1\text{H}$ ,  $^{31}\text{P}\{^1\text{H}\}$  and  $^{13}\text{C}\{^1\text{H}\}$ -APT NMR spectra of  $\text{SiMe}_3\text{NP}$ , 1-3,  $4[\text{IrCl}_2(\text{CO})_2]$ ,  $5\text{PF}_6$ ,  $6\text{PF}_6$ ,  $9^+$ ,  $11\text{PF}_6$ ,  $12\text{PF}_6$ , and  $13\text{PF}_6$

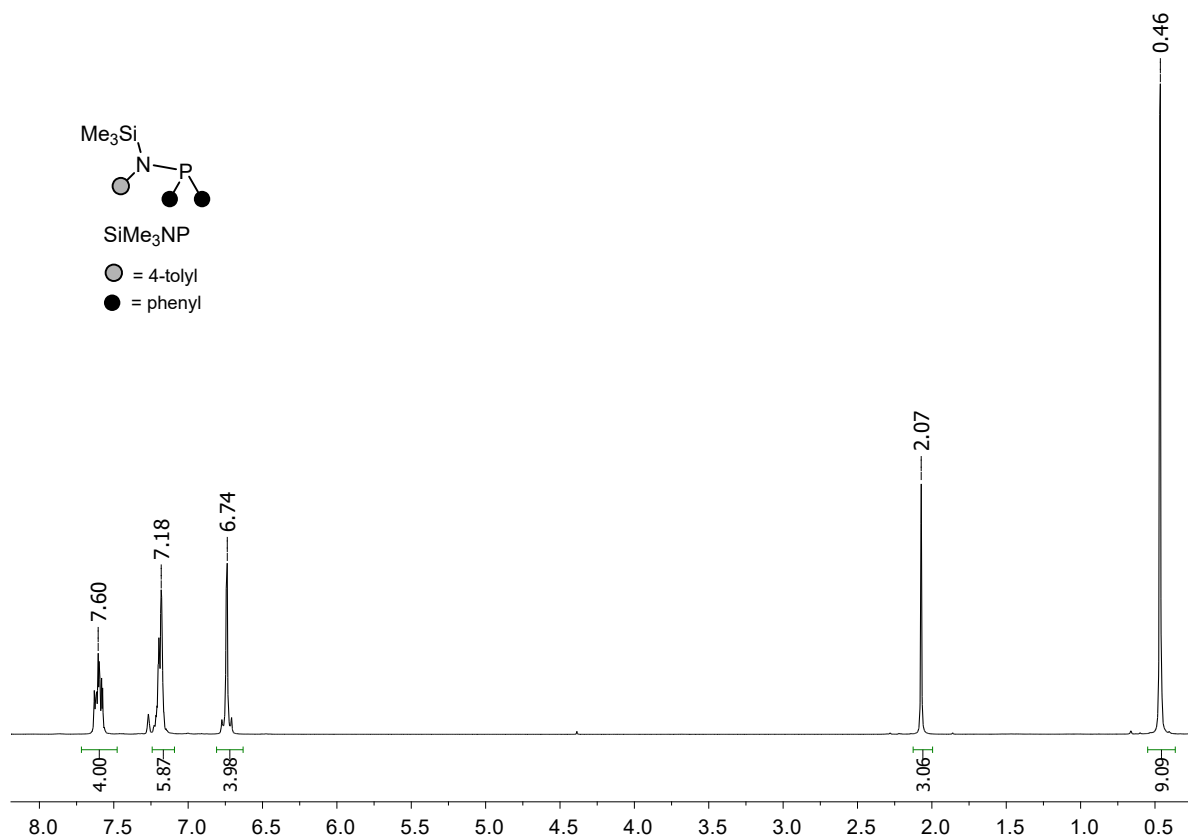

Fig. S19.  $^1\text{H}$  NMR spectrum of  $\text{SiMe}_3\text{NP}$ .

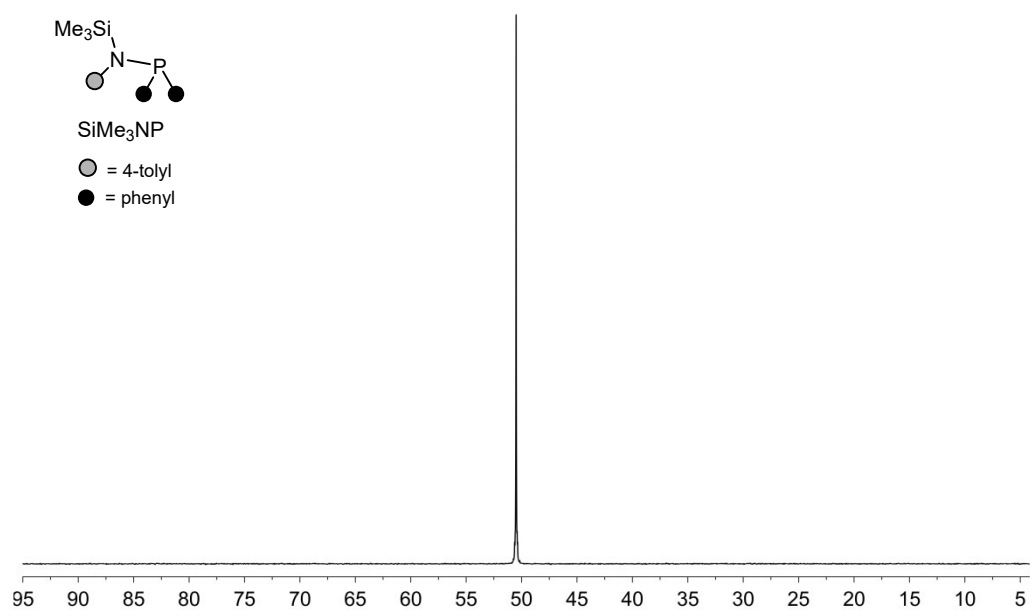

Fig. S110.  $^{31}\text{P}\{^1\text{H}\}$  NMR spectrum of  $\text{SiMe}_3\text{NP}$ .



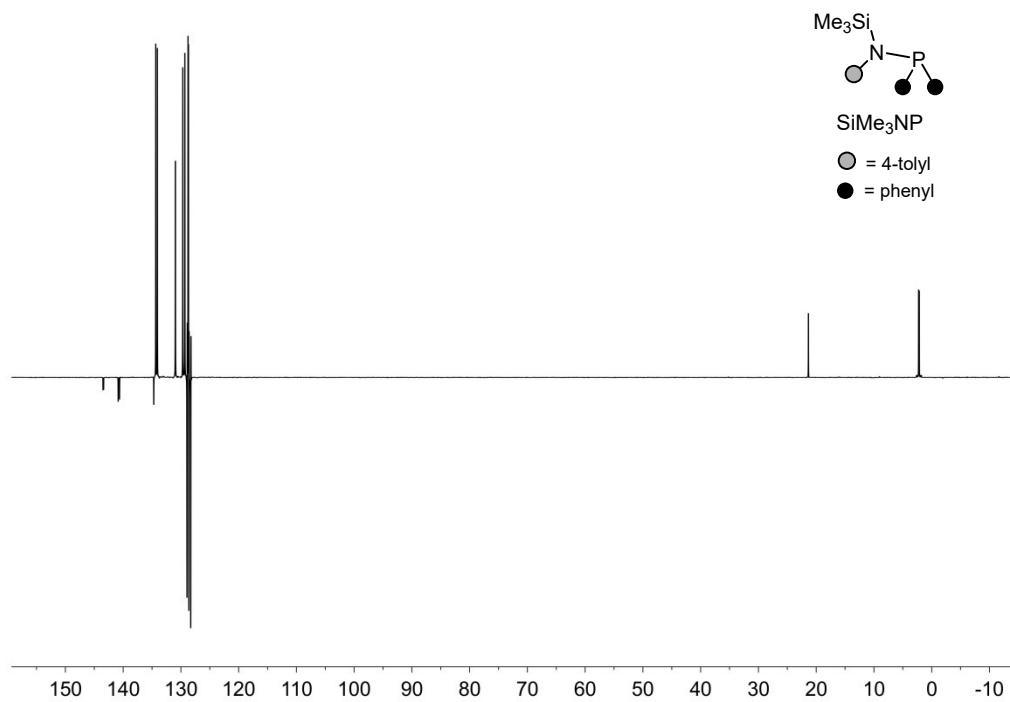

**Fig. SI11.** <sup>13</sup>C{<sup>1</sup>H}-apt NMR spectrum of SiMe<sub>3</sub>NP.

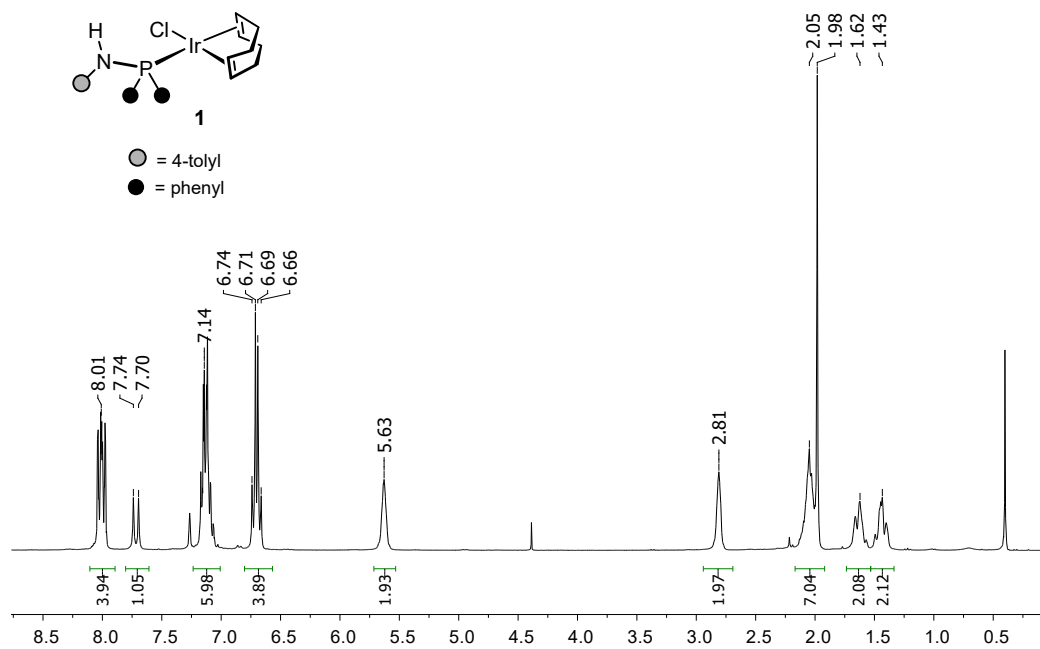

**Fig. SI12.** <sup>1</sup>H NMR spectrum of **1**.

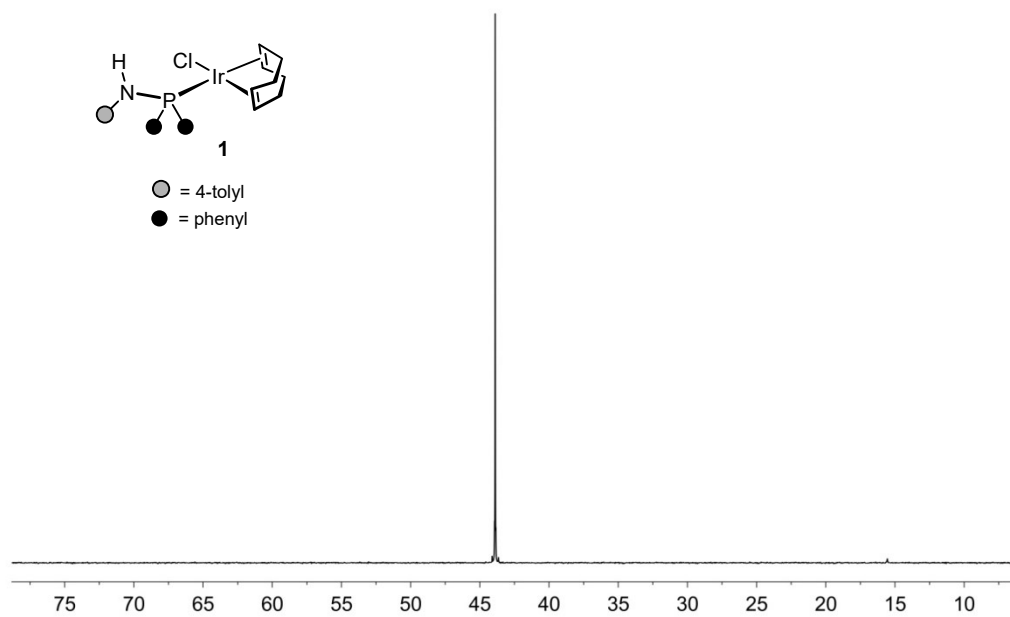

**Fig. S113.**  $^{31}\text{P}\{^1\text{H}\}$  NMR spectrum of **1**.

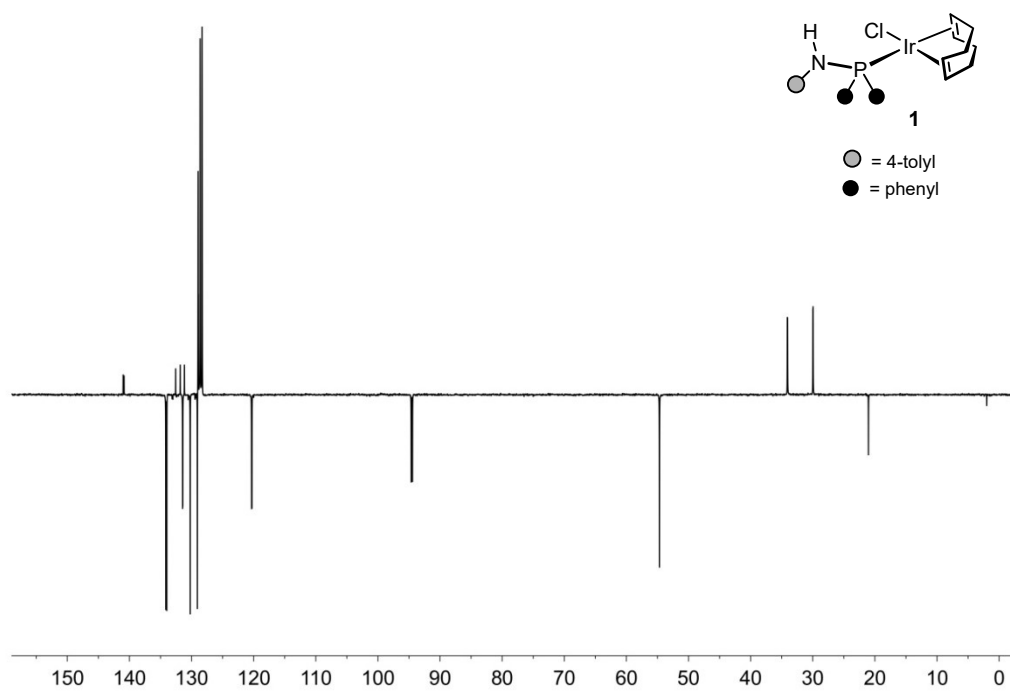

**Fig. S114.**  $^{13}\text{C}\{^1\text{H}\}$ -APT NMR spectrum of **1**.

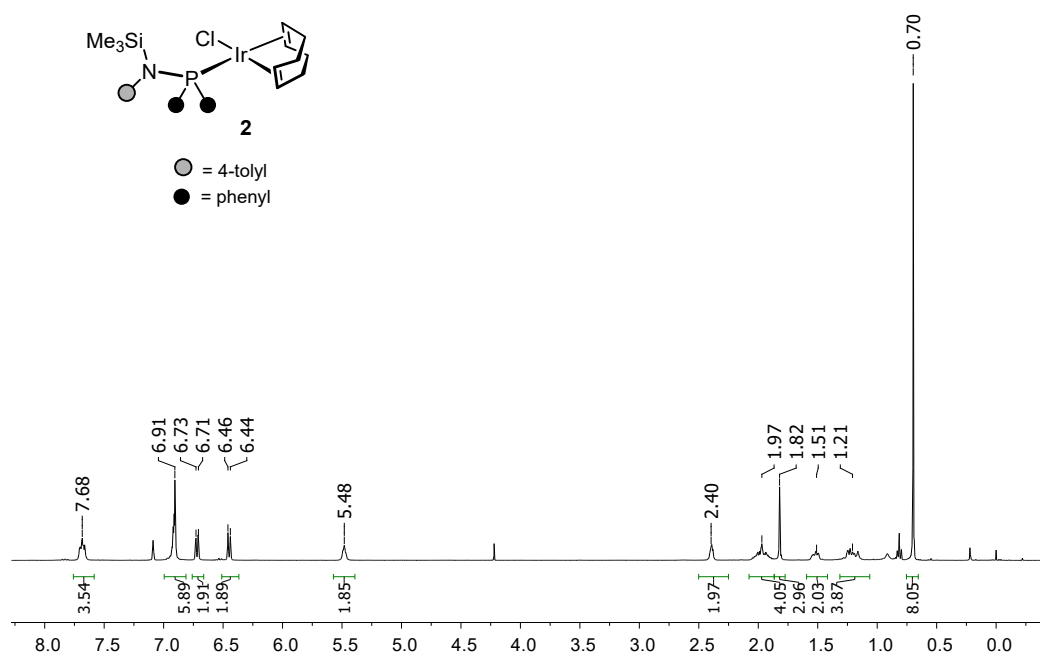

Fig. SI15. <sup>1</sup>H NMR spectrum of **2**.

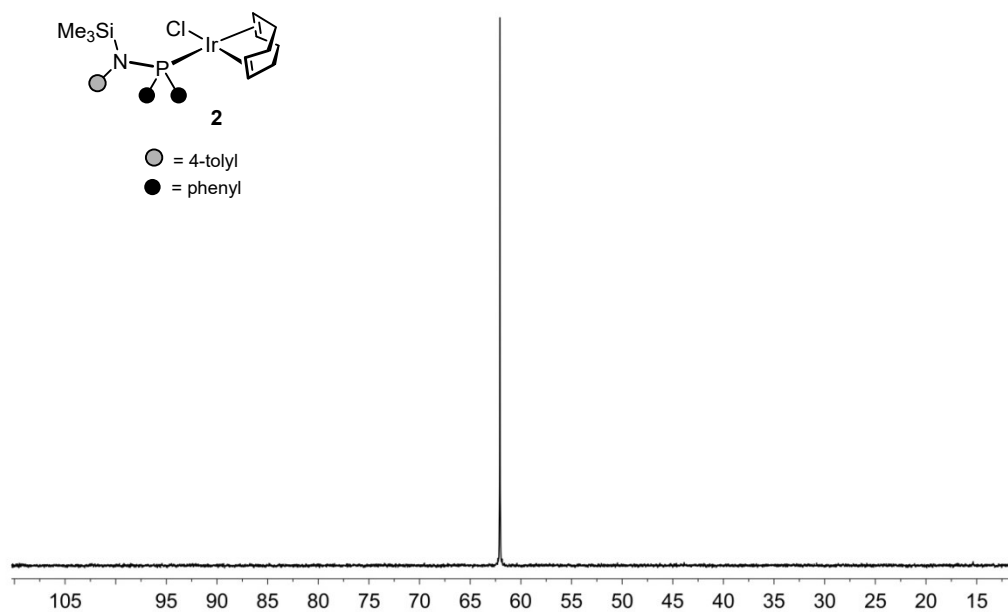

Fig. SI16. <sup>31</sup>P{<sup>1</sup>H} NMR spectrum of **2**.

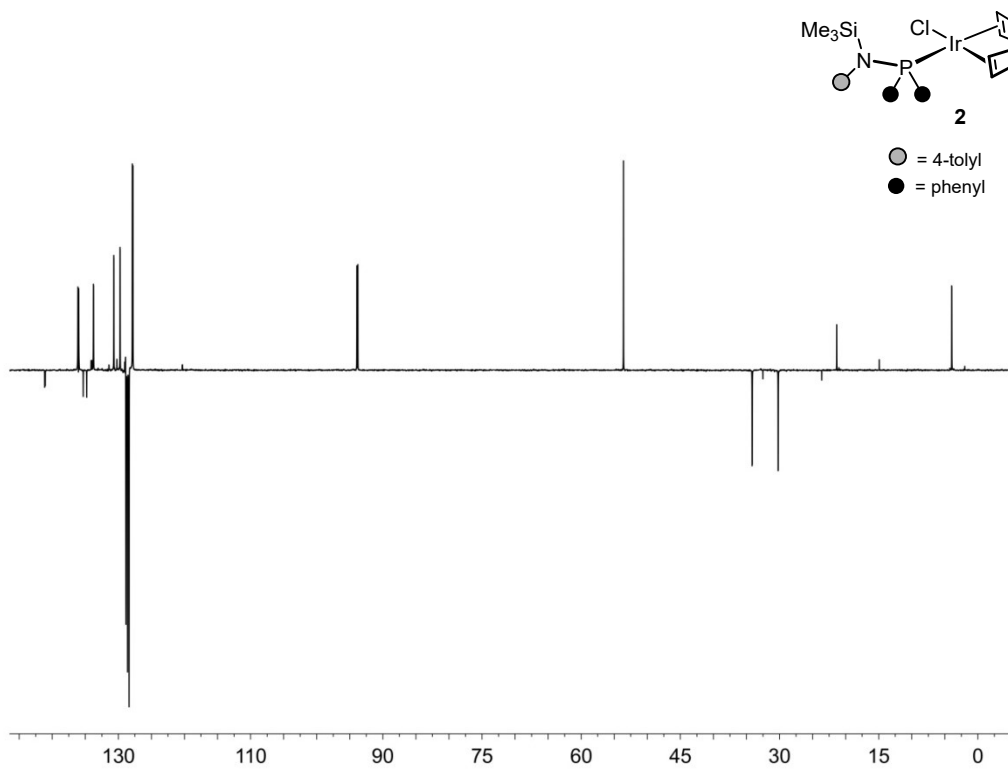

Fig. S117.  $^{13}\text{C}\{^1\text{H}\}$ -APT NMR spectrum of **2**.

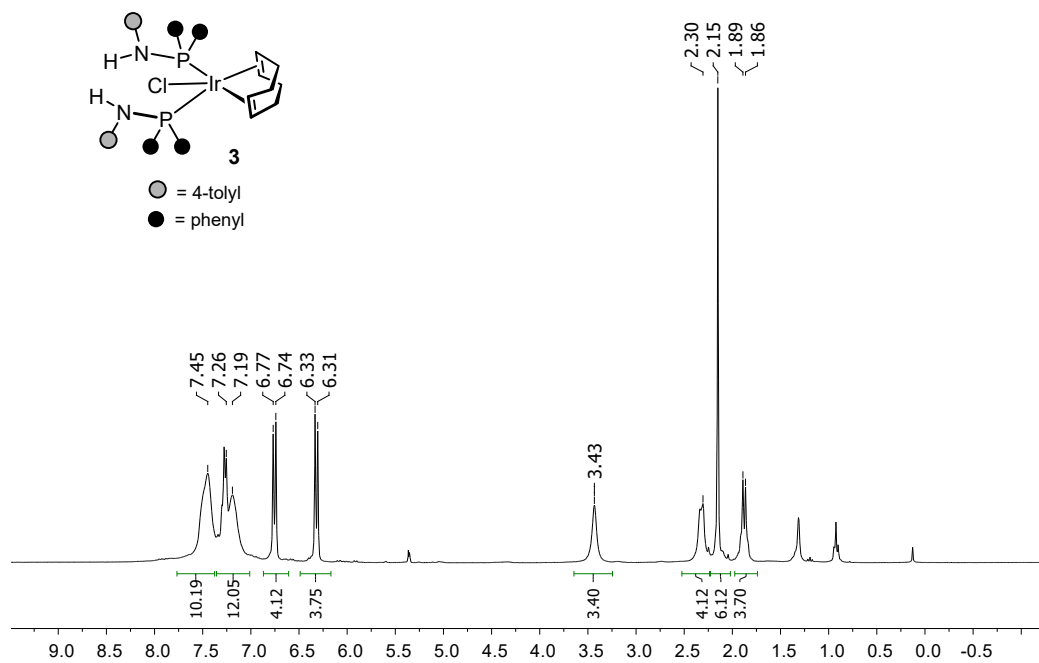

Fig. S118.  $^1\text{H}$  NMR spectrum of **3** (298 K).

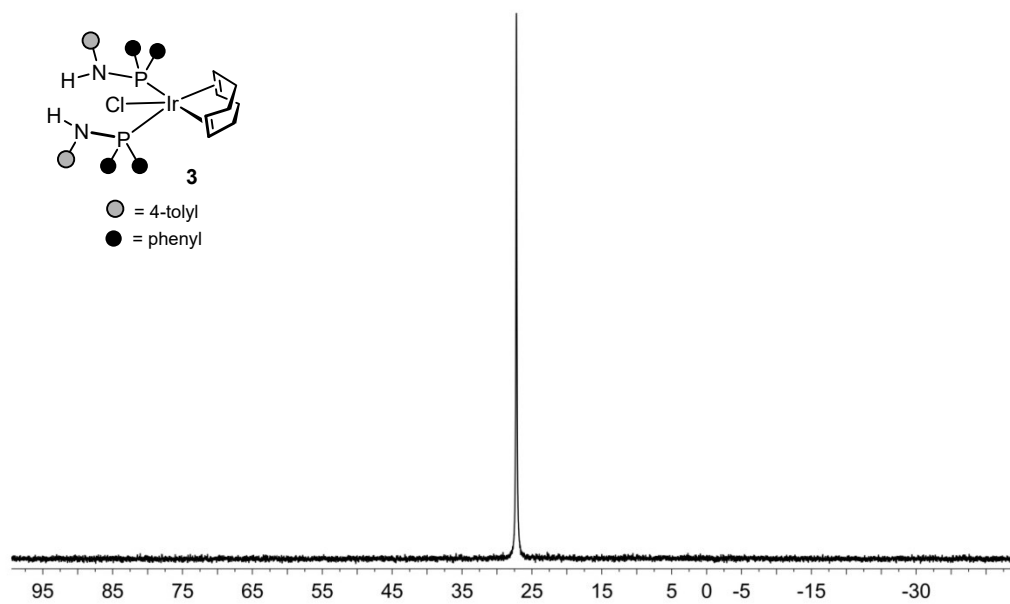

**Fig. SI19.**  $^{31}\text{P}\{^1\text{H}\}$  NMR spectrum of **3** (298 K).

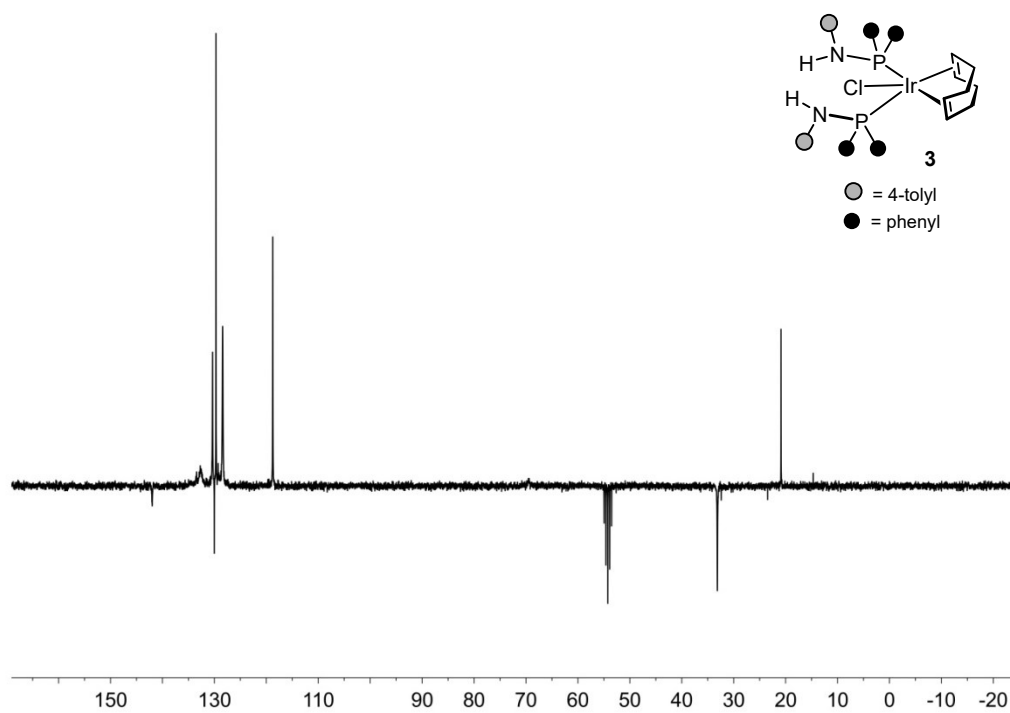

**Fig. SI20.**  $^{13}\text{C}\{^1\text{H}\}$ -APT NMR spectrum of **3** (298 K).

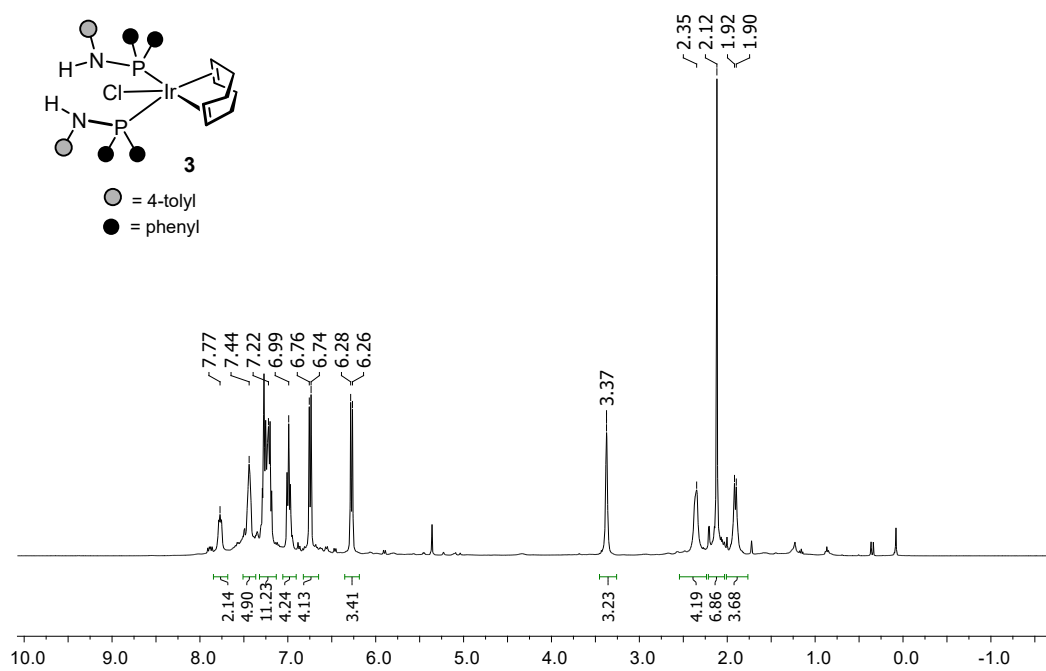

Fig. S121. <sup>1</sup>H NMR spectrum of **3** (213 K).

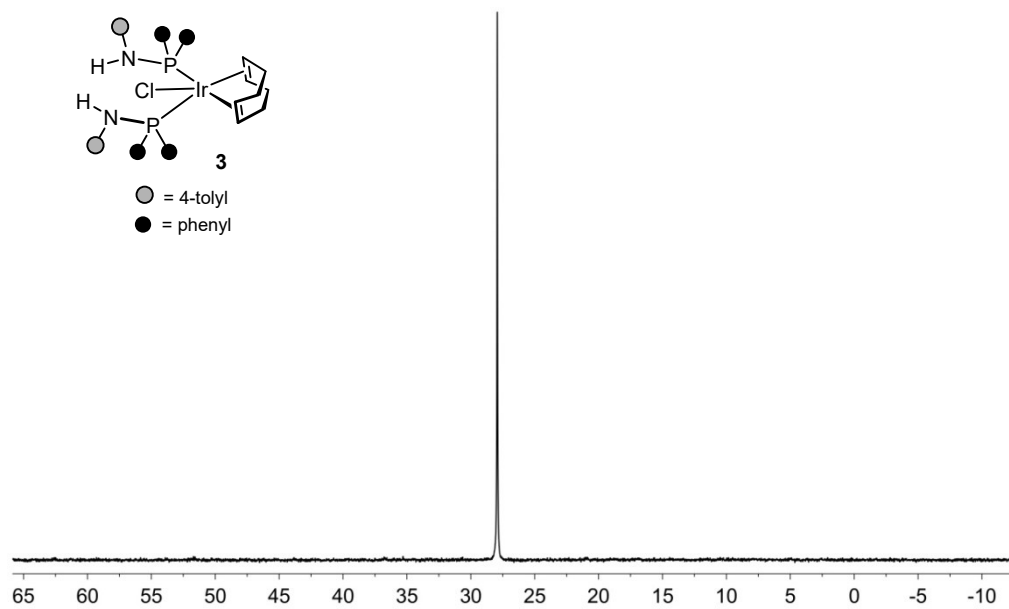

Fig. S122. <sup>31</sup>P{<sup>1</sup>H} NMR spectrum of **3** (213 K).

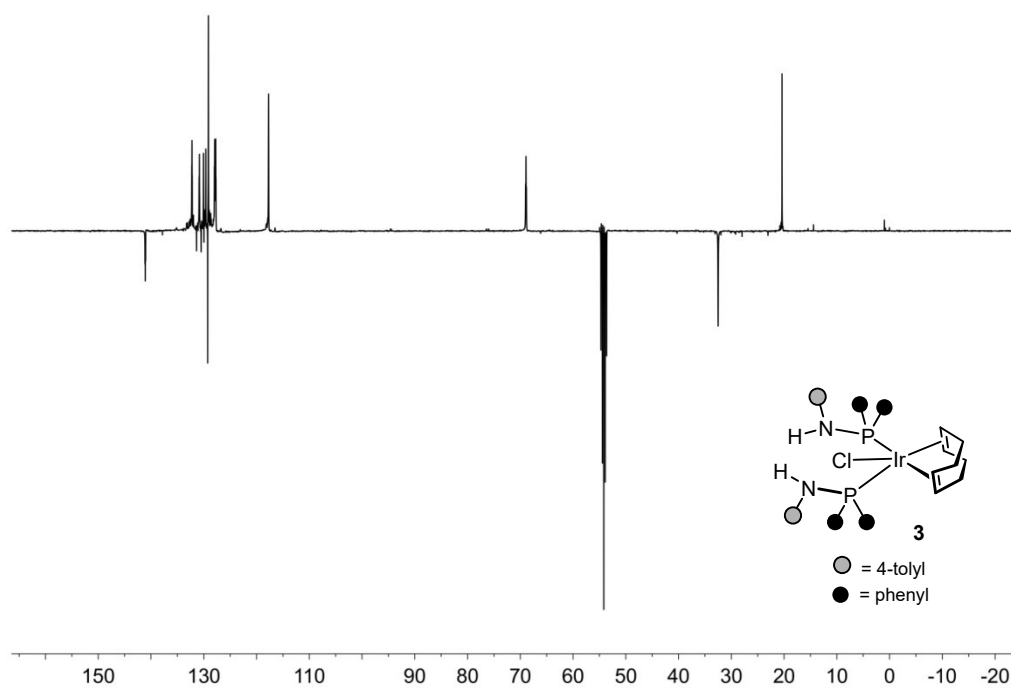

**Fig. SI23.**  $^{13}\text{C}\{^1\text{H}\}$ -APT NMR spectrum of **3** (213 K).

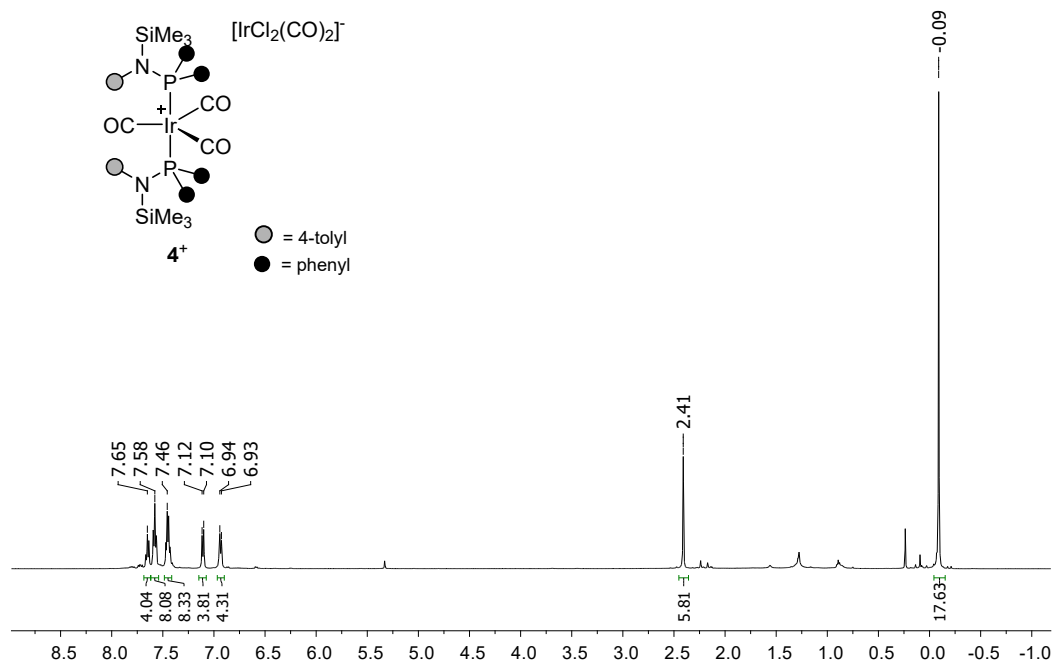

**Fig. SI24.**  $^1\text{H}$  NMR spectrum of **4**.

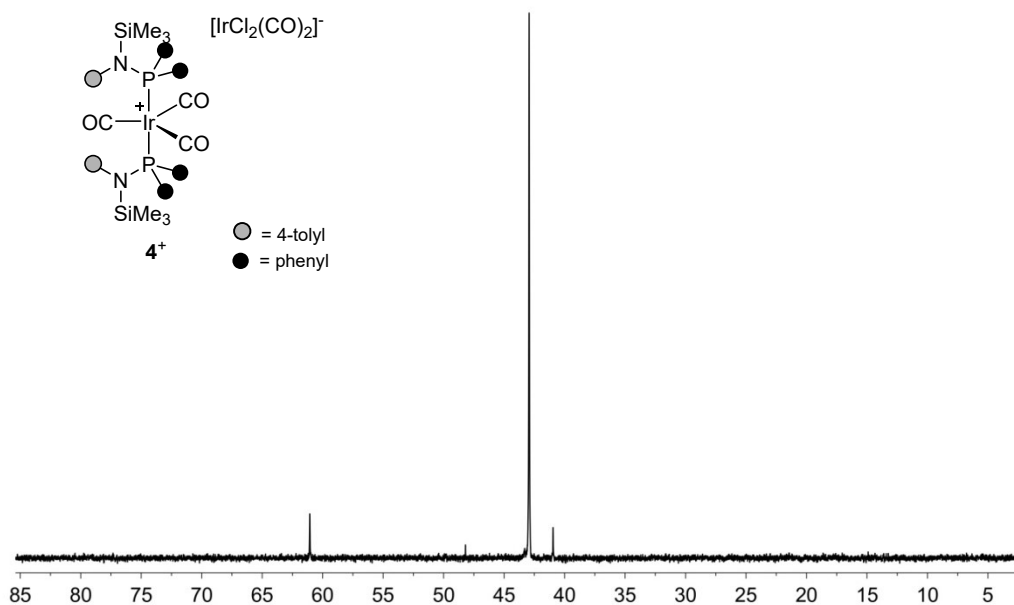

Fig. S125.  $^{31}\text{P}\{^1\text{H}\}$  NMR spectrum of 4.

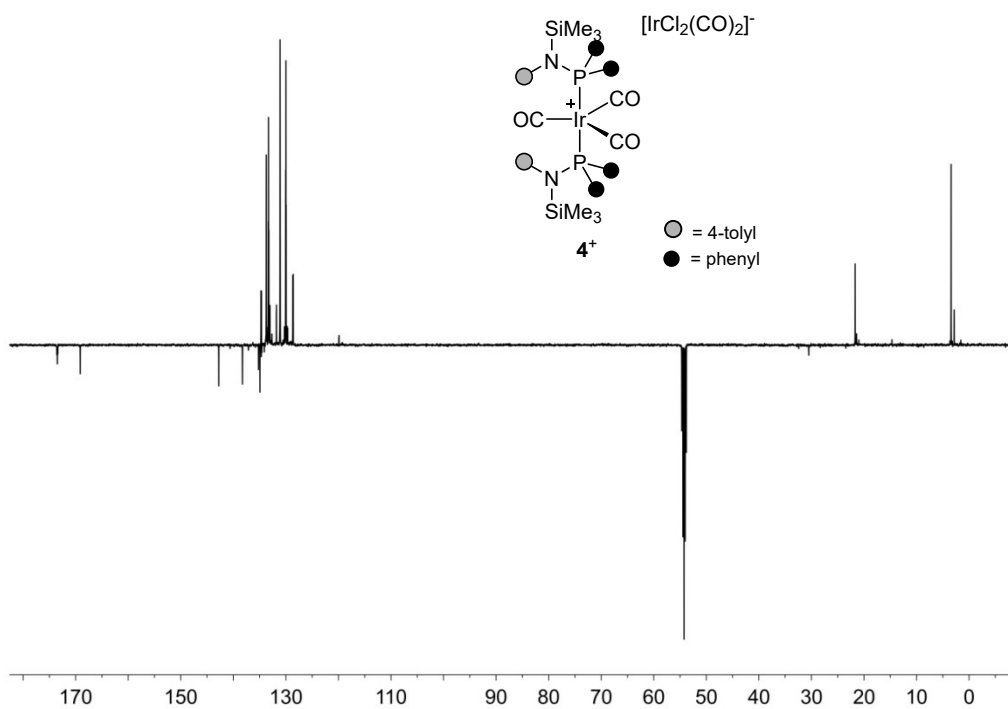

Fig. S126.  $^{13}\text{C}\{^1\text{H}\}$ -APT NMR spectrum of 4.



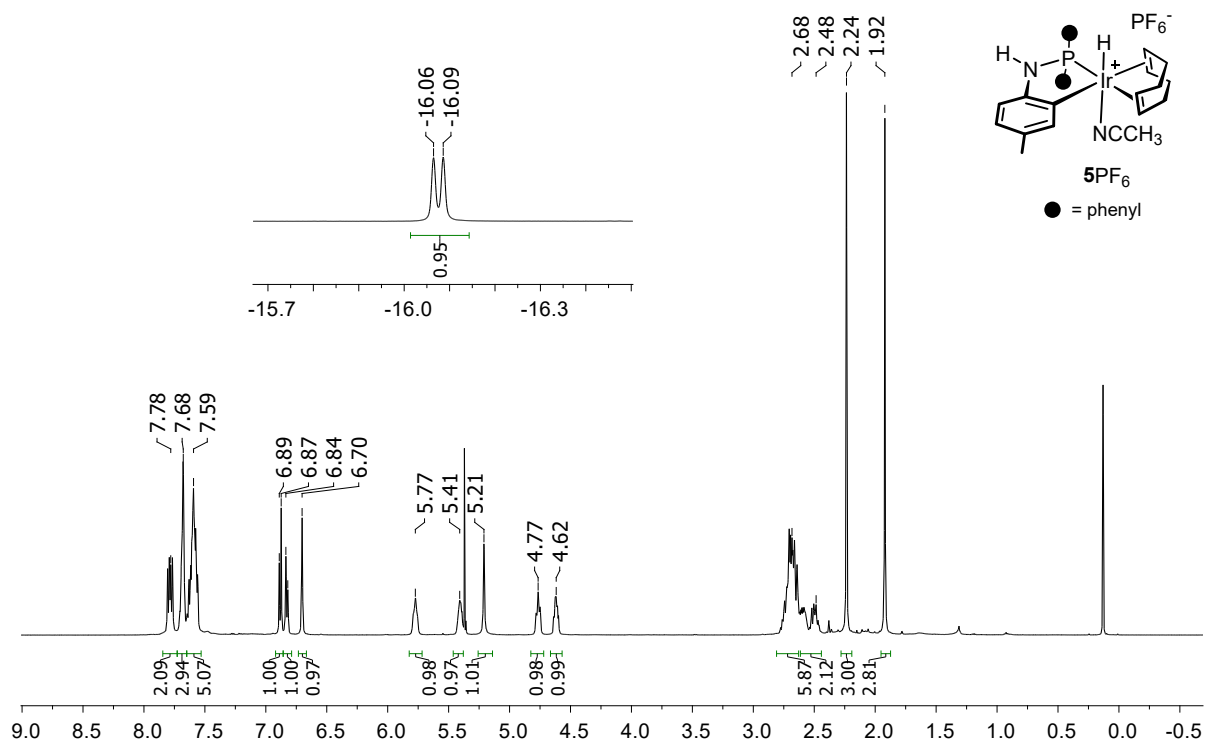

Fig. S127.  $^1H$  NMR spectrum of  $5PF_6$ .

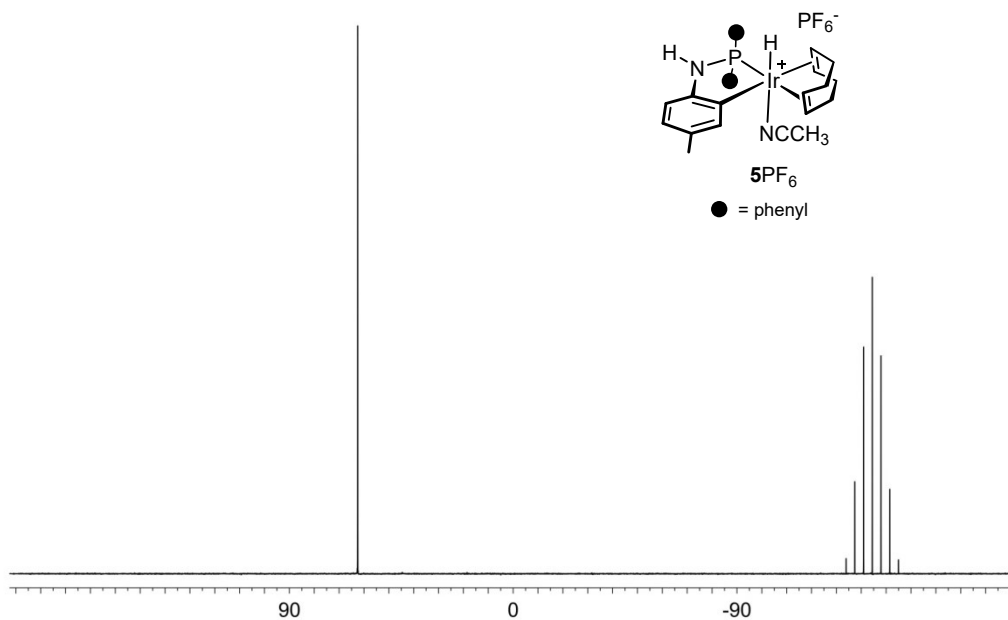

Fig. S128.  $^{31}P\{^1H\}$  NMR spectrum of  $5PF_6$ .

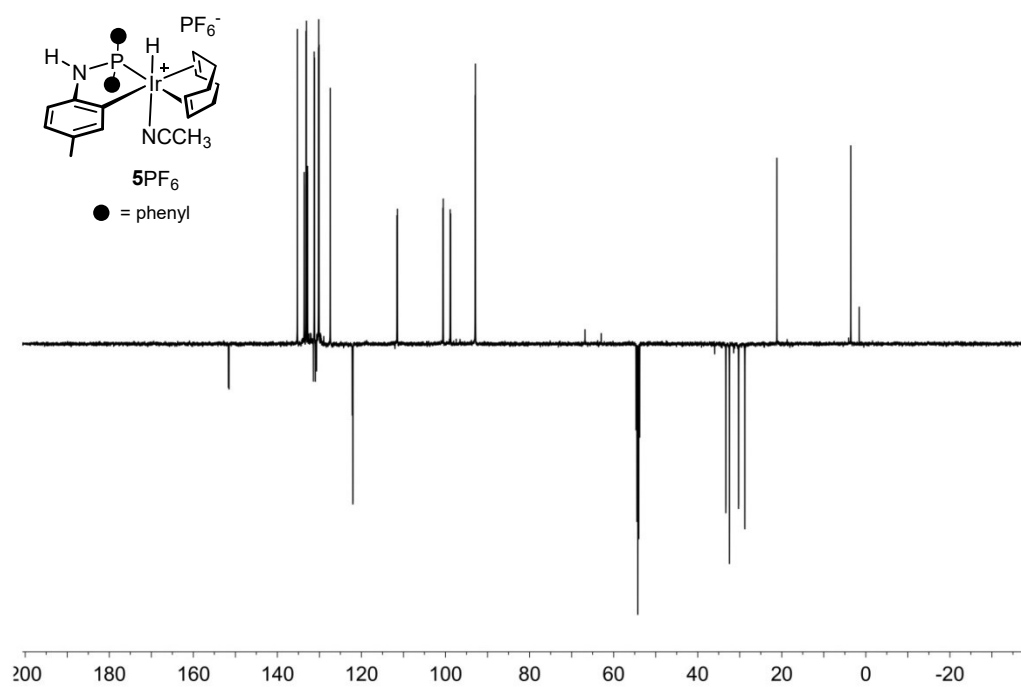

Fig. S129.  $^{13}\text{C}\{^1\text{H}\}$ -APT NMR spectrum of  $5\text{PF}_6$ .

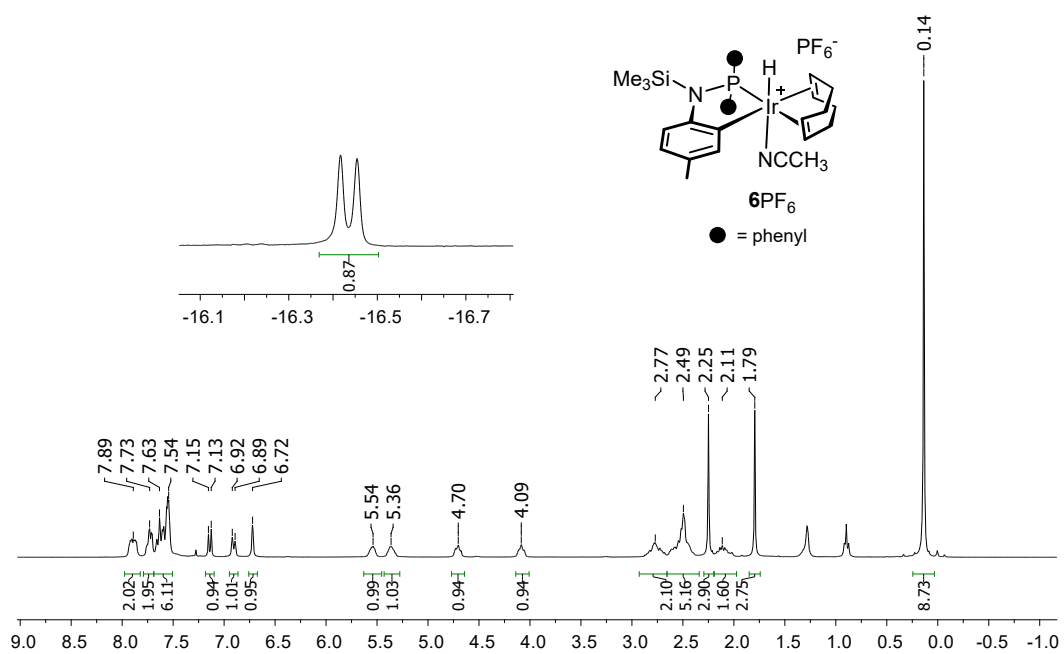

Fig. S130.  $^1\text{H}$  NMR spectrum of  $6\text{PF}_6$ .

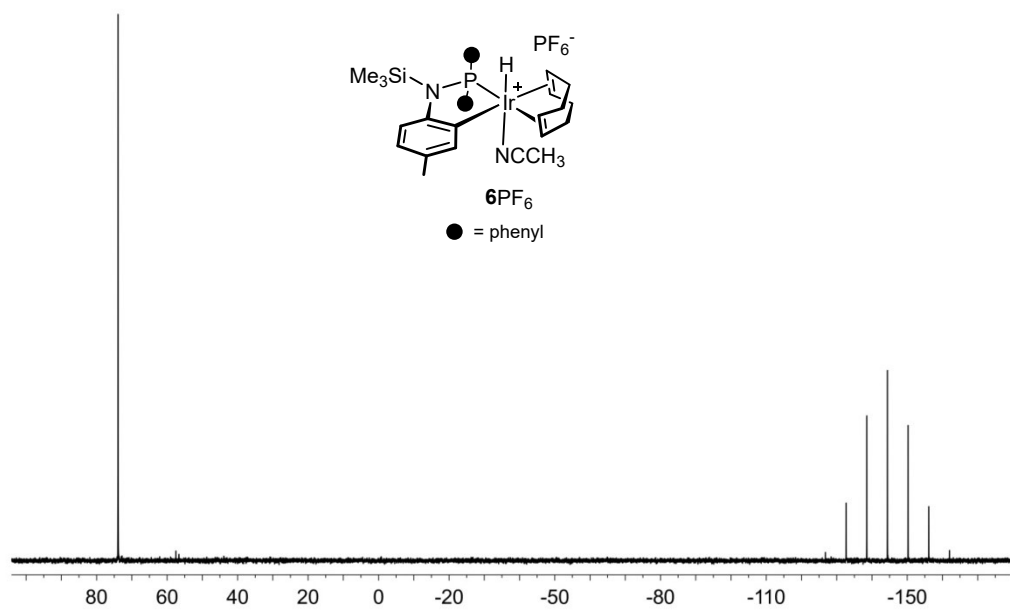

Fig. S131.  $^{31}P\{^1H\}$  NMR spectrum of  $6PF_6$ .

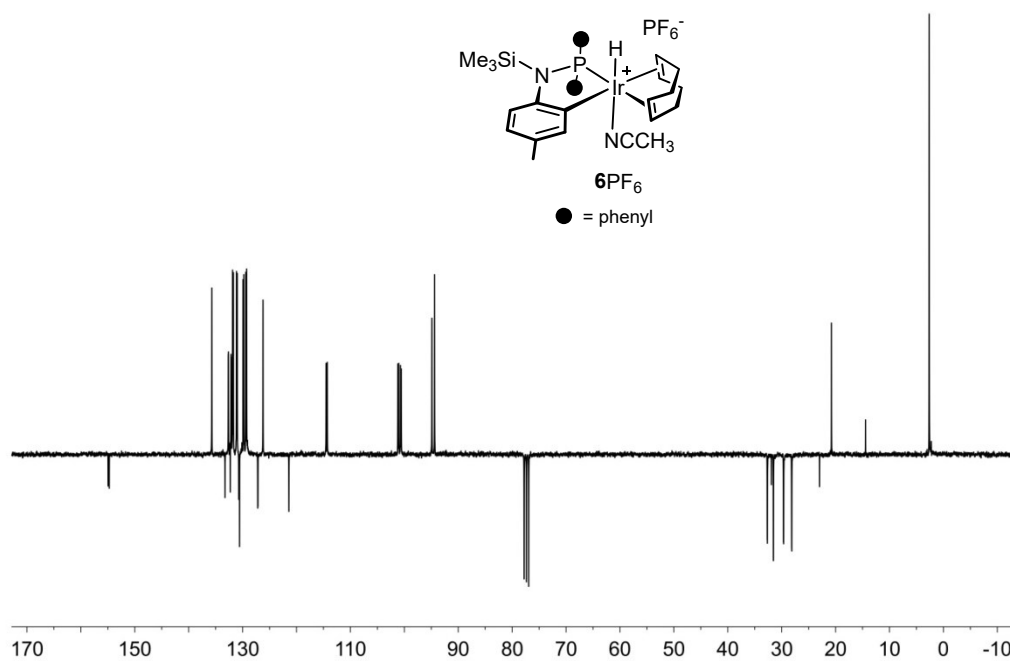

Fig. S132.  $^{13}C\{^1H\}$ -apt NMR spectrum of  $6PF_6$ .

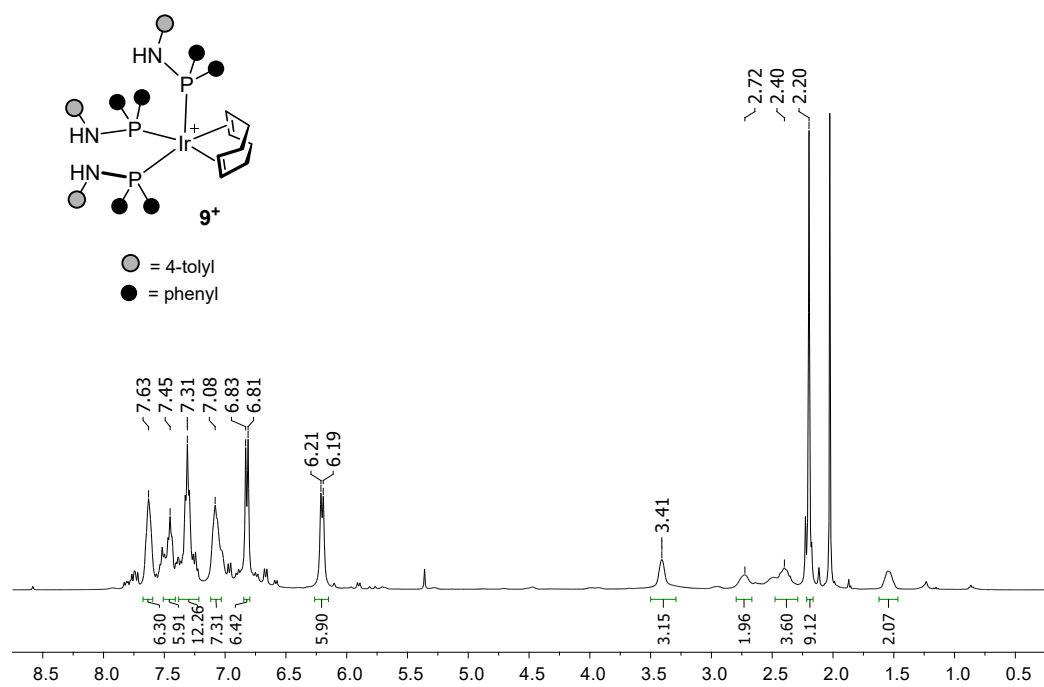

Fig. S133.  $^1\text{H}$  NMR spectrum of  $9^+$  (233 K,  $\text{CD}_2\text{Cl}_2$ , prepared in situ).

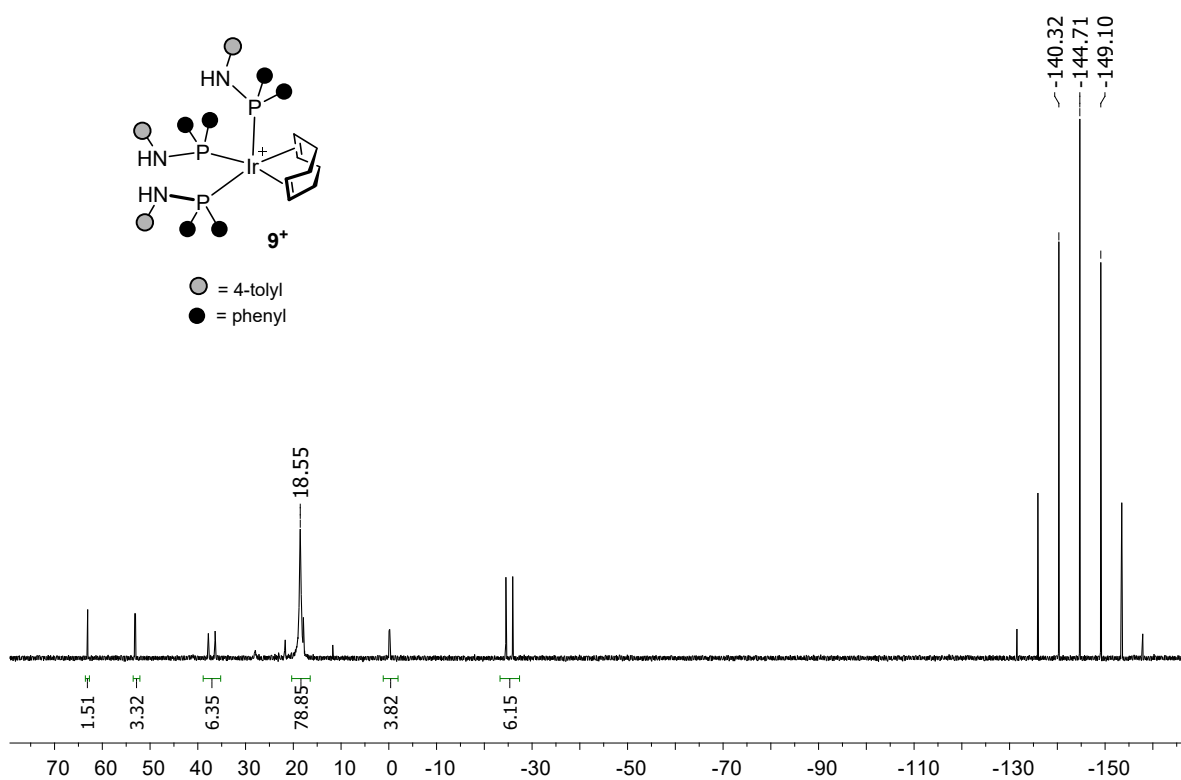

Fig. S134.  $^{31}\text{P}\{^1\text{H}\}$  NMR spectrum of  $9^+$  (233 K,  $\text{CD}_2\text{Cl}_2$ , prepared in situ).

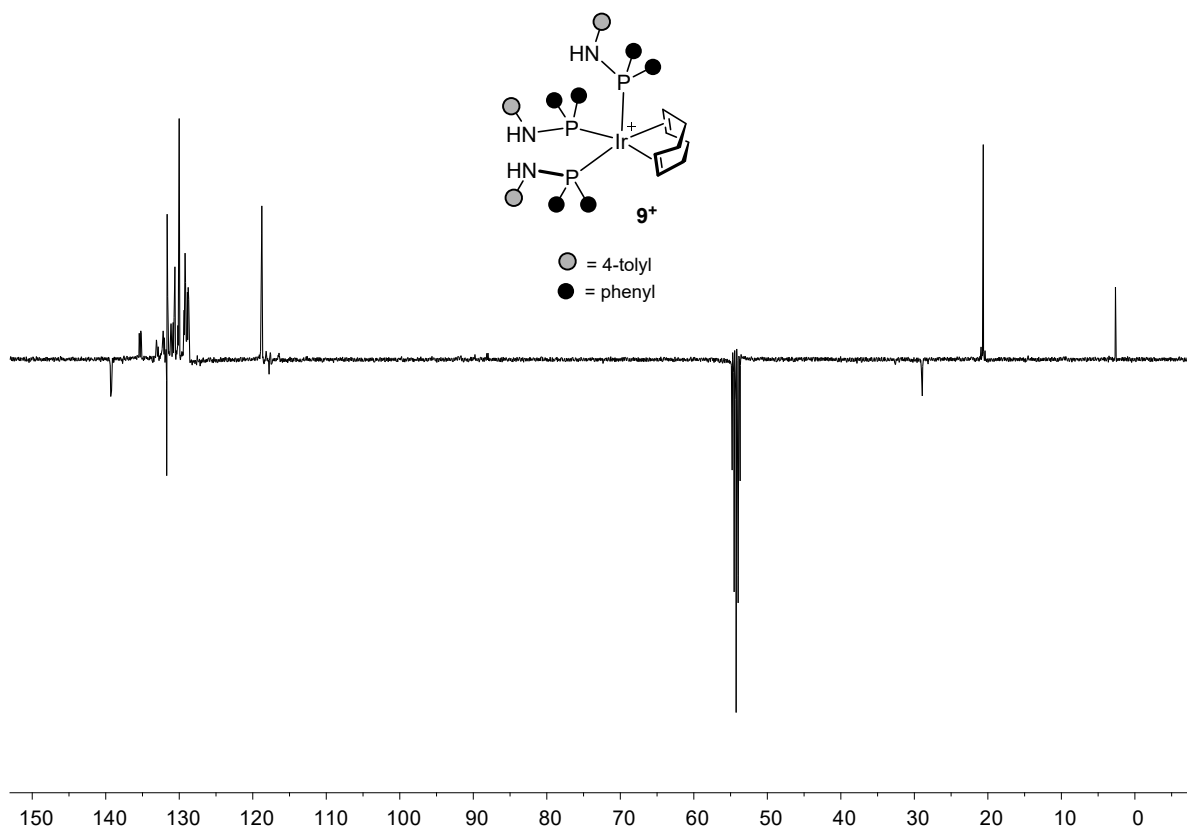

Fig. S135.  $^{13}\text{C}\{^1\text{H}\}$ -apt NMR spectrum of **9<sup>+</sup>** (233 K,  $\text{CD}_2\text{Cl}_2$ , prepared in situ).

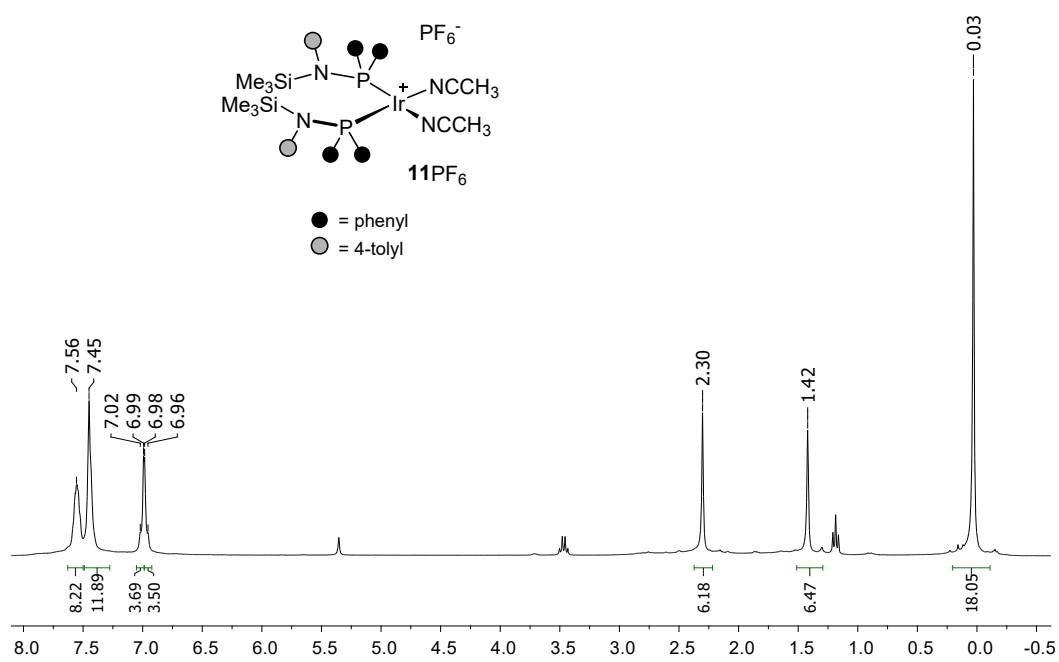

Fig. S136.  $^1\text{H}$  NMR spectrum of **11PF<sub>6</sub>**.

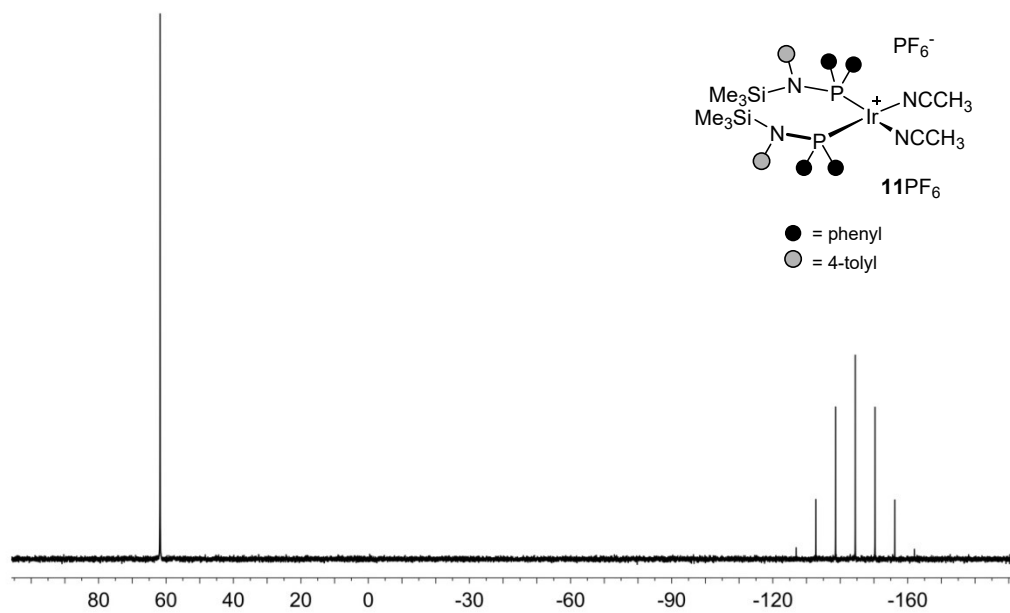

**Fig. SI37.** <sup>31</sup>P{<sup>1</sup>H} NMR spectrum of **11PF<sub>6</sub>**.

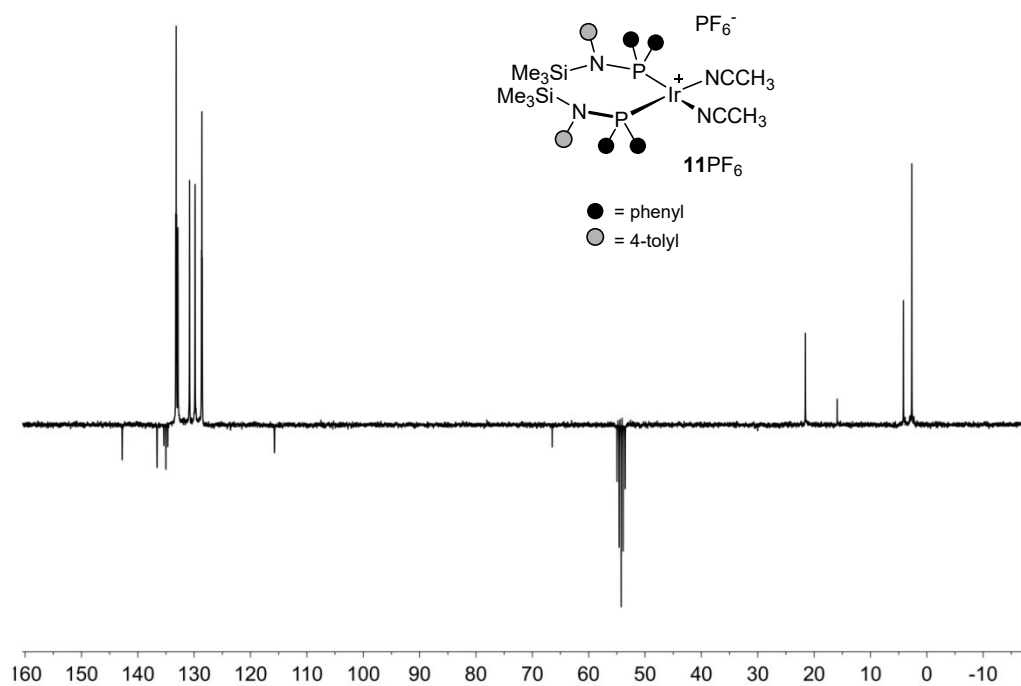

**Fig. SI38.** <sup>13</sup>C{<sup>1</sup>H}-apt NMR spectrum of **11PF<sub>6</sub>**.

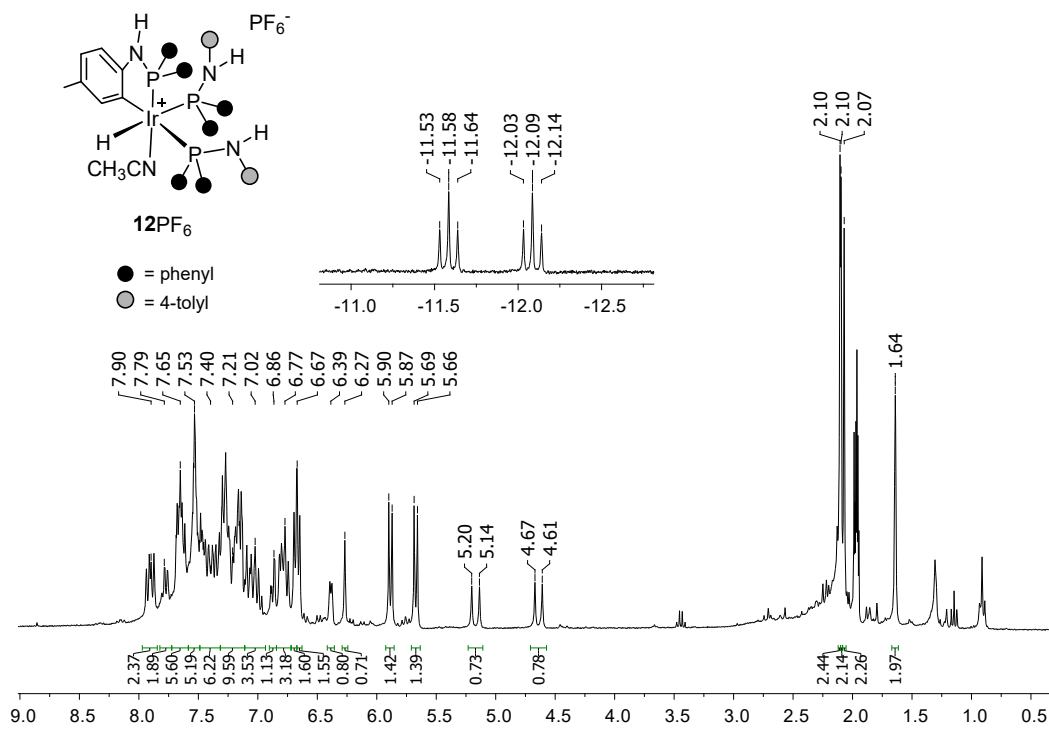

Fig. S139. <sup>1</sup>H NMR spectrum of 12PF<sub>6</sub>.

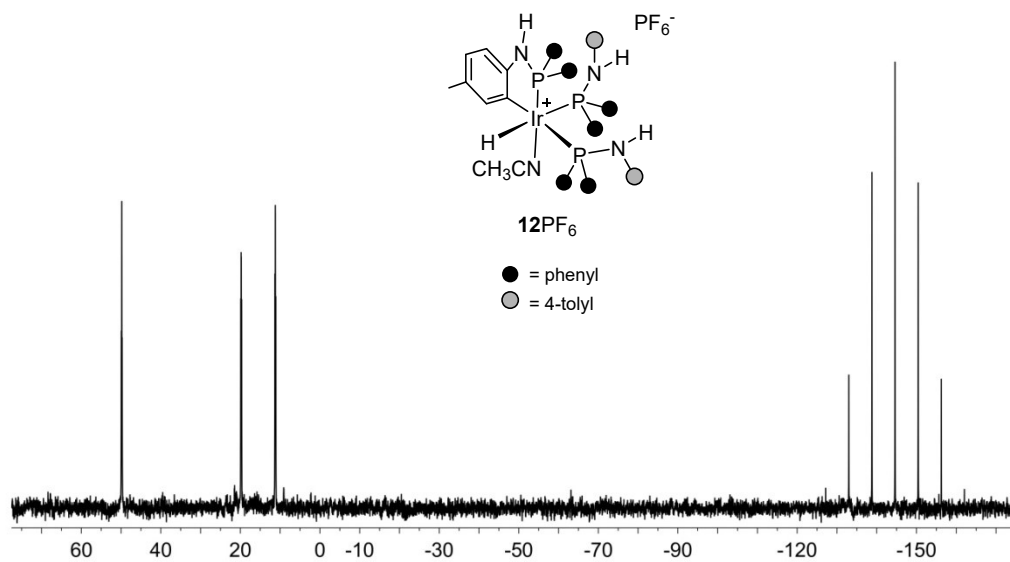

Fig. S140. <sup>31</sup>P{<sup>1</sup>H} NMR spectrum of 12PF<sub>6</sub>.

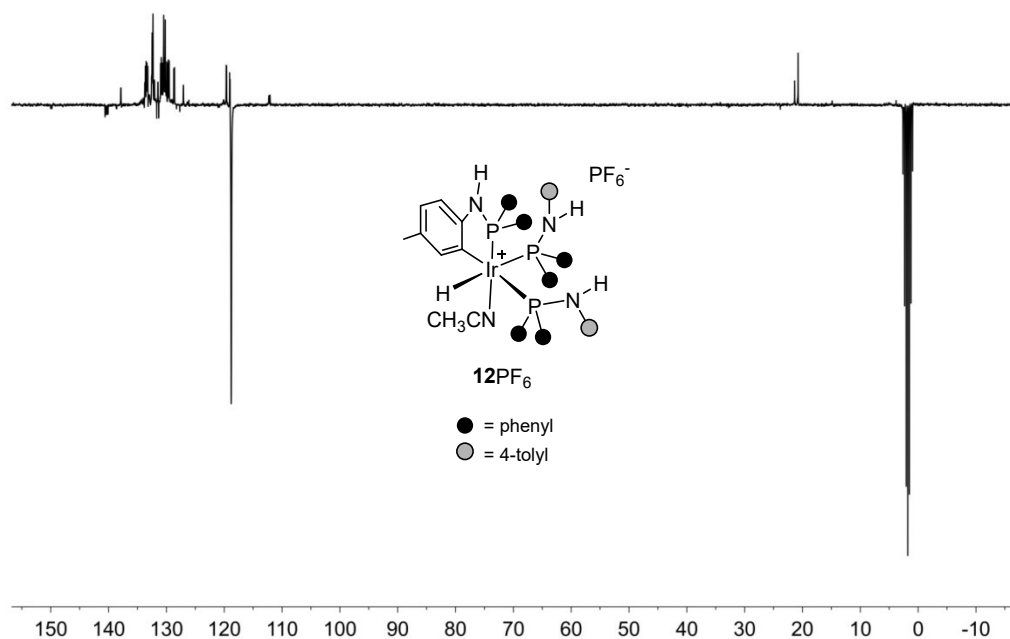

**Fig. SI41.**  $^{13}\text{C}\{^1\text{H}\}$ -apt NMR spectrum of  $12\text{PF}_6$ .

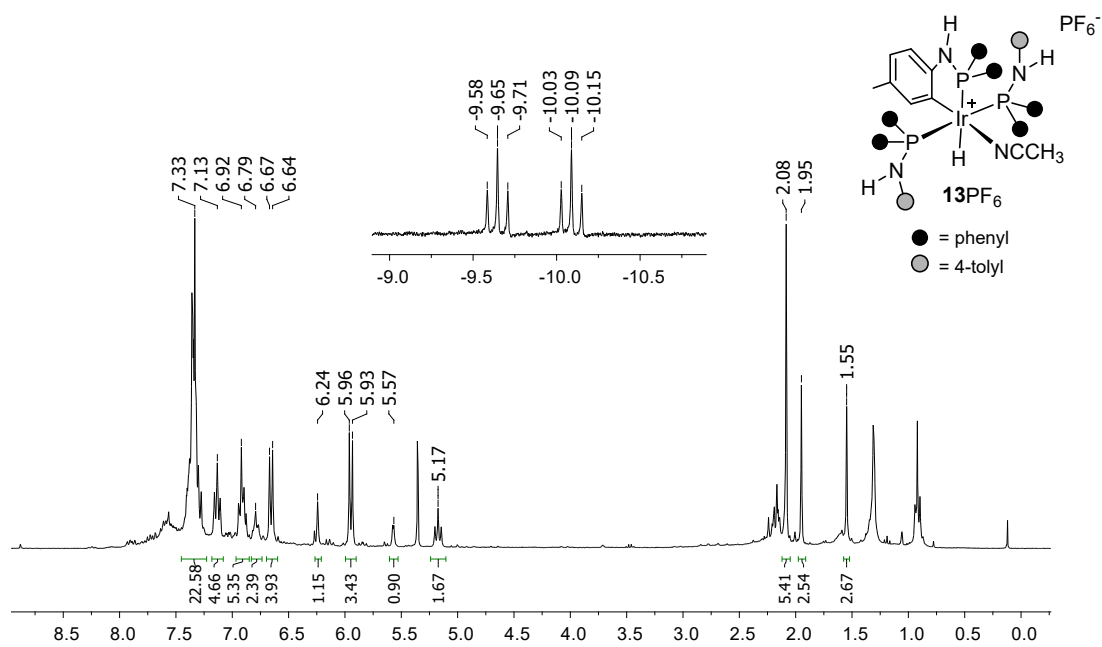

**Fig. SI42.**  $^1\text{H}$  NMR spectrum of  $13\text{PF}_6$ .



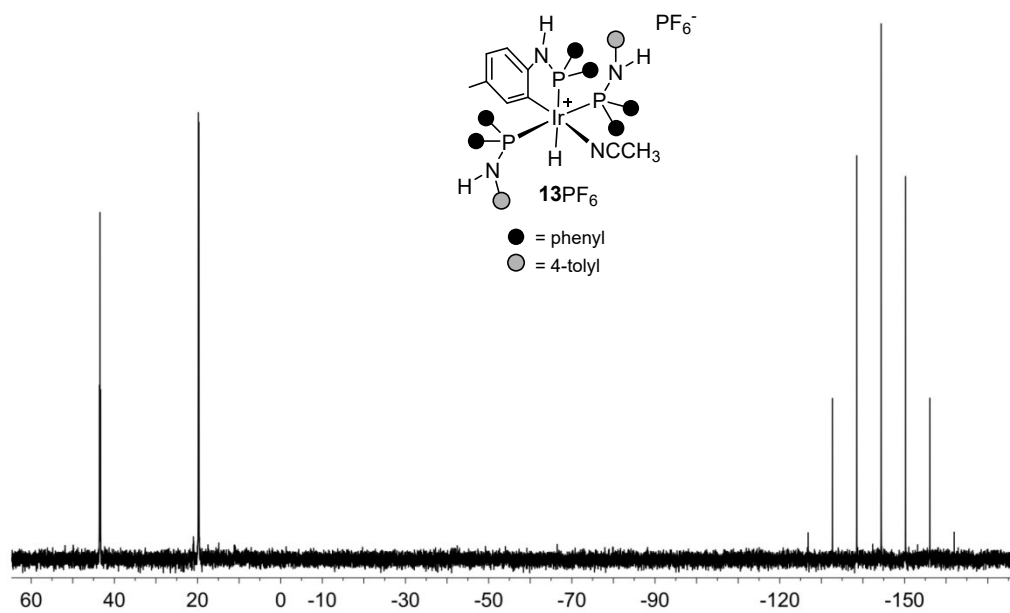

**Fig. SI43.**  $^{31}\text{P}\{^1\text{H}\}$  NMR spectrum of  $13\text{PF}_6$ .

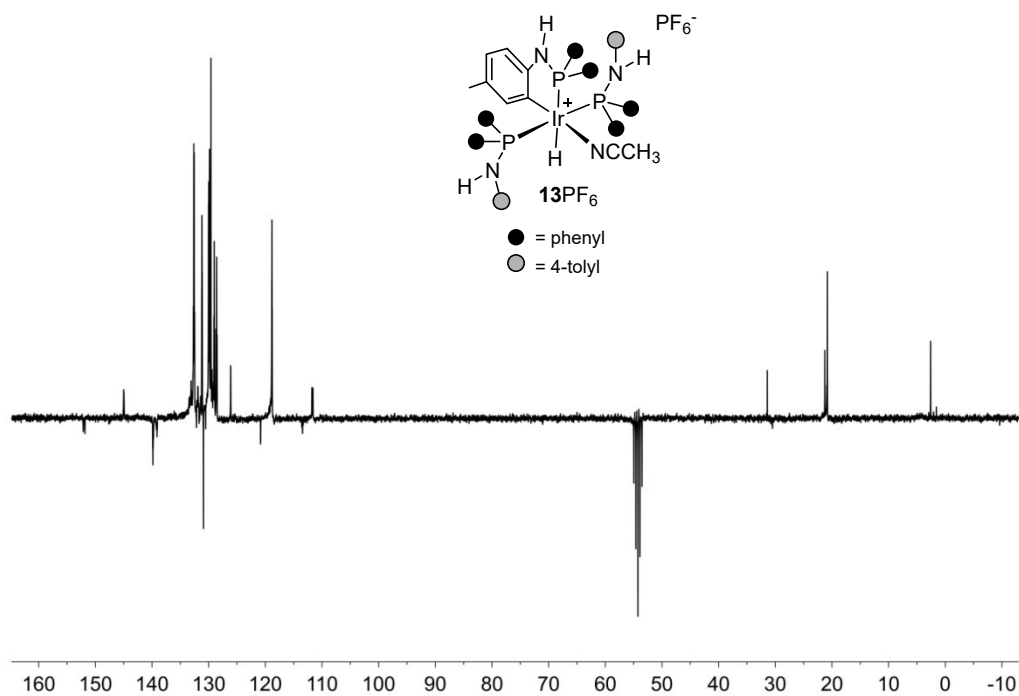

**Fig. SI44.**  $^{13}\text{C}\{^1\text{H}\}$ -apt NMR spectrum of  $13\text{PF}_6$ .

## 6. Monitoring of the reaction $12^+ \rightleftharpoons 13^+$ in $\text{CH}_2\text{Cl}_2$

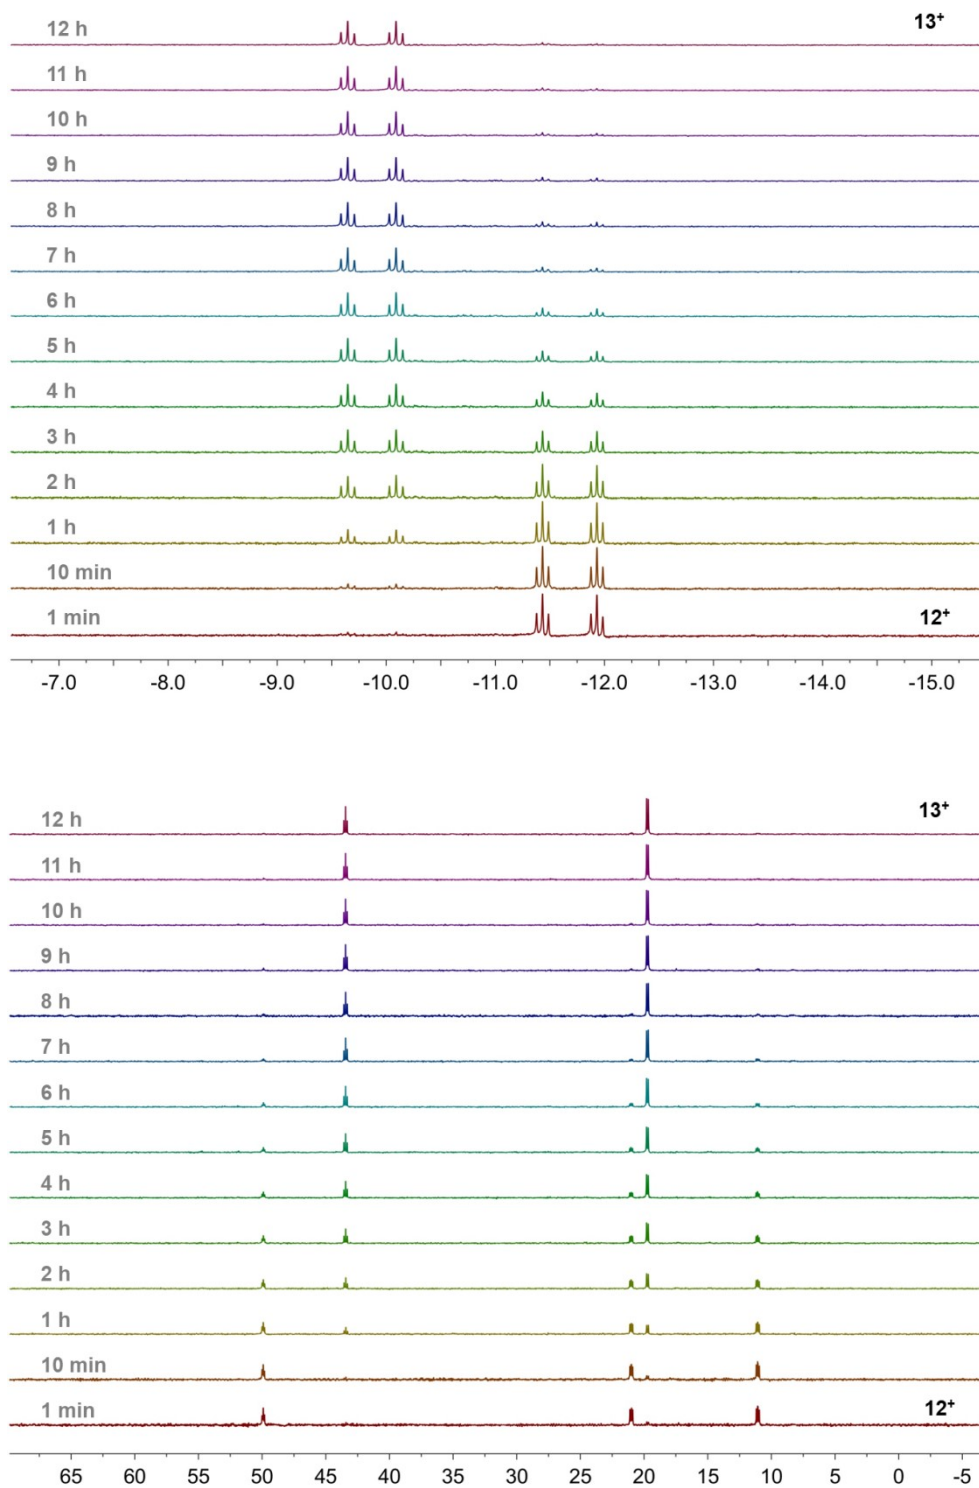

Fig. S145. Monitoring of the reaction  $12^+ \rightleftharpoons 13^+$  in  $\text{CH}_2\text{Cl}_2$  at 298 K: (top)  $^1\text{H}$  NMR; (bottom)  $^{31}\text{P}\{^1\text{H}\}$  NMR.

## 7. DFT data for the reaction $7^+ \rightarrow 8^+$

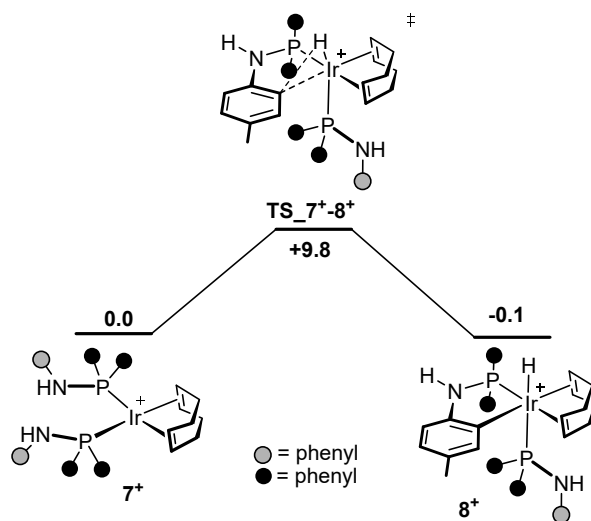

**Fig. SI46.** Gibbs free energy profile for the reaction  $7^+ \rightarrow 8^+$  along with the calculated Gibbs free energies (kcal·mol<sup>-1</sup>, B3PW91-GD3BJ/def2svp, CH<sub>2</sub>Cl<sub>2</sub>, 298 K, 1 atm).
